# Supplementary material for: On the Robustness of the Weakening Effect of Anthropogenic Aerosols on the East Asian Summer Monsoon with Multimodel Results
Source: Hindawi journal article supplement (doi:10.1155/2015/397395), 2015-01-01
Supplement: f1 [file 397395.f1.pdf]

Supplementary Material for manuscript “On the robustness of the weakening effect of anthropogenic aerosols on the East Asian summer monsoon with multi-models results”

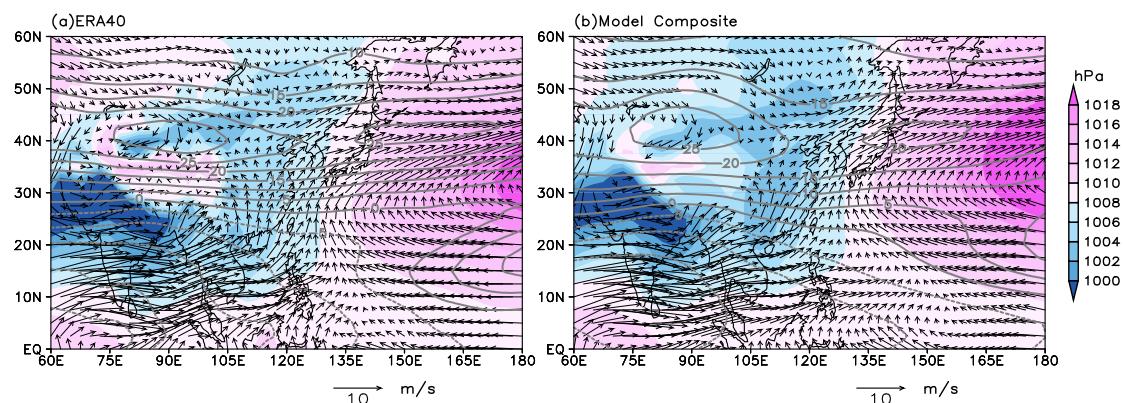

FIGURE S1: Climatology of summer (JJA) wind at 850 hPa (units: m/s, vector), zonal wind at 200 hPa (units: m/s, contour) and sea level pressure (units: hPa, shaded) as derived from (a) the ERA40 data for the period 1971-2000 and (b) the ensemble mean of multi-models for 30 years.

TABLE S1: Spatial Correlation coefficients of summer wind at 850 hPa, zonal wind at 200 hPa and sea level pressure between the ERA40 and the models’ outputs

| Model         | U850 | V850 | U200 | SLP  |
|---------------|------|------|------|------|
| BCC-CSM1.1    | 0.87 | 0.70 | 0.96 | 0.92 |
| CanESM2       | 0.93 | 0.83 | 0.98 | 0.79 |
| CSIRO-Mk3.6.0 | 0.82 | 0.75 | 0.94 | 0.80 |
| FGOALS-s2     | 0.87 | 0.78 | 0.97 | 0.91 |
| GFDL-CM3      | 0.82 | 0.82 | 0.97 | null |
| HadGEM2-A     | 0.91 | 0.85 | 0.96 | 0.80 |
| IPSL-CM5A-LR  | 0.88 | 0.79 | 0.90 | 0.73 |
| MIROC5        | 0.94 | 0.85 | 0.95 | 0.93 |
| MRI-CGCM3     | 0.81 | 0.78 | 0.95 | 0.86 |
| NorESM1-M     | 0.89 | 0.75 | 0.96 | 0.91 |

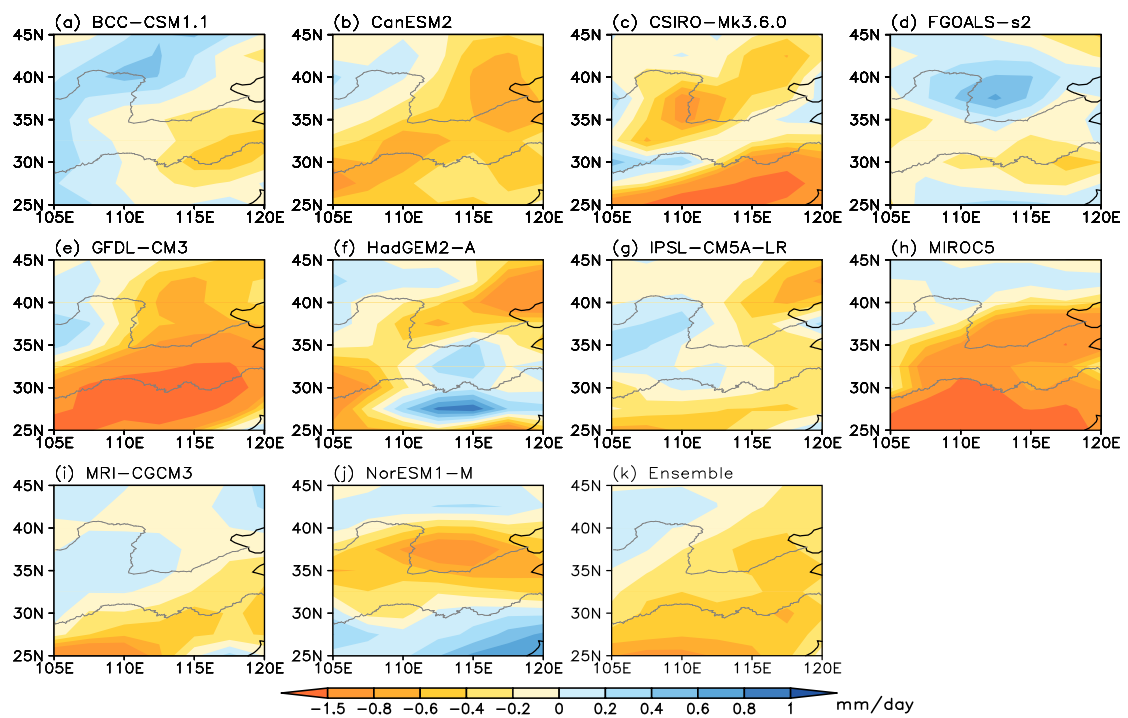

FIGURE S2: Difference of summer (JJA) precipitation between the Aerosol run and the CTL run (Aerosol run minus CTL run) in each model and the ensemble mean of multi-models for 30 years over the study region in East China.
